# Supplementary material for: Whole-Genome Sequencing Investigation of a Large Nosocomial Outbreak Caused by ST131 H30Rx KPC-Producing Escherichia coli in Italy
Source: MDPI journal article supplement (doi:10.3390/antibiotics10060718), 2021-06-15
Supplement: s1 [file s1]

## Article

# Whole-genome Sequencing Investigation of a Large Nosocomial Outbreak Caused by ST131 H30Rx KPC-Producing *Escherichia coli* in Italy

Aurora Piazza <sup>1,\*</sup>, Luigi Principe <sup>2,†</sup>, Francesco Comandatore <sup>3,†</sup>, Matteo Perini <sup>3,†</sup>, Elisa Meroni <sup>4,†</sup>, Vittoria Mattioni Marchetti <sup>5</sup>, Roberta Migliavacca <sup>1</sup> and Francesco Luzzaro <sup>4</sup>

<sup>1</sup> Clinical-Surgical, Diagnostic and Pediatric Sciences Department, Unit of Microbiology and Clinical Microbiology, University of Pavia, 27100 Pavia, Italy; roberta.migliavacca@unipv.it

<sup>2</sup> Clinical Pathology and Microbiology Unit, S. Giovanni di Dio Hospital, 88900 Crotone, Italy; luigi.principe@gmail.com

<sup>3</sup> Romeo and Enrica Invernizzi Pediatric Research Center, Department of Biomedical and Clinical Sciences L. Sacco, University of Milan, 20157 Milan, Italy; francesco.comandatore@unimi.it (F.C.); matteo.perini@unimi.it (M.P.)

<sup>4</sup> Microbiology and Virology Unit, A. Manzoni Hospital, 23900 Lecco, Italy; el.meroni@asst-lecco.it (E.M.); f.luzzaro@asst-lecco.it (F.L.)

<sup>5</sup> Biomedical Center, Faculty of Medicine in Pilsen, Charles University, 323 00 Pilsen, Czech Republic; vittoria.mattionimarche01@universitadipavia.it

\* Correspondence: [aurora.piazza@unipv.it](mailto:aurora.piazza@unipv.it)

† These authors contributed equally to this work.

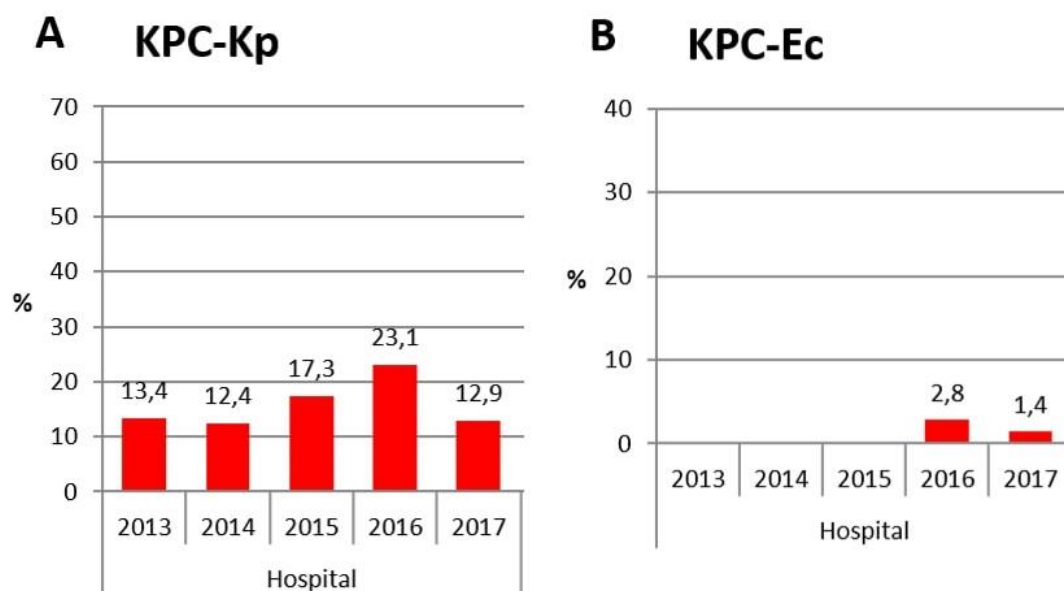

**Figure S1.** Local prevalence of KPC-Kp and KPC-Ec in the period 2014–2016 in the hospital setting.

**Table S1.** *Escherichia coli* (KPC-Ec) isolates selected for WGS analysis and co-isolation of *Klebsiella pneumoniae* (KPC-Kp) isolates from the same patients.

| ID Sample | KPC-Ec Isolation Date | KPC-Ec—Clinical Sample | KPC-Kp Isolation Date | KPC-Kp—Clinical Sample |
|-----------|-----------------------|------------------------|-----------------------|------------------------|
| sk35y35t  | 15 February 2016      | Rectal swab            | 28 October 2015       | Ulcer                  |
| sk36y36t  | 16 February 2016      | Rectal swab            | 15 July 2015          | Rectal swab            |
| sk37y37t  | 26 February 2016      | Urine                  | -                     | -                      |

|            |                   |                       |                  |             |
|------------|-------------------|-----------------------|------------------|-------------|
| sk38y38t   | 29 February 2016  | Rectal swab           | 08 March 2016    | Rectal swab |
| sk39y39t   | 01 March 2016     | Urine                 | -                | -           |
| sk40y40t   | 03 March 2016     | Purulent exudate      | 15 July 2015     | Rectal swab |
| sk42y42t   | 03 March 2016     | Urine                 | 31 March 2016    | Rectal swab |
| sk41y41t   | 08 March 2016     | Blood                 | 08 March 2016    | Rectal swab |
| sk43y43t   | 17 March 2016     | Rectal swab           | 08 March 2016    | Rectal swab |
| sk44y44t   | 23 March 2016     | Blood                 | 08 March 2016    | Rectal swab |
| sk45y45t   | 05 April 2016     | Urine                 | 29 March 2016    | Rectal swab |
| sk46y46t   | 18 April 2016     | Bronchial aspirate    | 16 February 2016 | Rectal swab |
| sk47y47t   | 18 April 2016     | Urine                 | -                | -           |
| sk48y48t   | 21 April 2016     | Surgical wound swab   | 16 October 2017  | Rectal swab |
| sk49y49t   | 24 April 2016     | Peritoneal fluid      | 11 January 2016  | Rectal swab |
| sk50y50t   | 10 May 2016       | Respiratory secretion | -                | -           |
| sk51y51t   | 13 May 2016       | Urine                 | -                | -           |
| sk52y52t   | 22 May 2016       | Urine                 | -                | -           |
| sk53y53t   | 11 June 2016      | Urine                 | 19 February 2016 | Rectal swab |
| sk54y54t   | 25 June 2016      | Urine                 | 03 March 2016    | Rectal swab |
| sk55y55t   | 29 June 2016      | Drainage fluid        | 16 March 2016    | Rectal swab |
| sk56y56t   | 30 June 2016      | Urine                 | 11 February 2016 | Rectal swab |
| sk57y57t   | 13 July 2016      | Urine                 | 02 March 2016    | Rectal swab |
| sk58y58t   | 13 July 2016      | Rectal swab           | 02 March 2016    | Rectal swab |
| sk59y59t   | 14 July 2016      | Purulent exudate      | -                | -           |
| sk60y60t   | 30 September 2016 | Rectal swab           | 16 March 2016    | Rectal swab |
| sk185y185t | 14 November 2016  | Respiratory secretion | 21 July 2015     | Rectal swab |
| sk136y136t | 23 January 2017   | Rectal swab           | -                | -           |
| sk137y137t | 05 June 2017      | Rectal swab           | -                | -           |

The index strain is indicated in bold.

**Table S2.** *Klebsiella pneumoniae* (KPC-Kp) isolates selected for WGS analysis and co-isolation of *Escherichia coli* (KPC-Ec) isolates from the same patients.

| ID sample  | KPC-Kp—Isolation Date | KPC-Kp—Clinical Sample | KPC-Ec -Isolation Date | KPC-Ec—Clinical Sample |
|------------|-----------------------|------------------------|------------------------|------------------------|
| sk138y138t | 22 January 2016       | Urine                  | 03 March 2016          | Purulent exudate       |
| sk139y139t | 16 February 2016      | Rectal swab            | 16 February 2016       | Rectal swab            |
| sk140y140t | 25 February 2016      | Rectal swab            | 25 February 2016       | Rectal swab            |
| sk141y141t | 25 February 2016      | Urine                  | 29 February 2016       | Rectal swab            |
| sk142y142t | 22 March 2016         | Rectal swab            | 01 March 2016          | Rectal swab            |
| sk143y143t | 31 March 2016         | Rectal swab            | 03 March 2016          | Rectal swab            |

**Table S3.** List of the ENA codes for the genome assemblies of the studied strains.

| ID       | Sample     | Experiment                | Run        |
|----------|------------|---------------------------|------------|
| sk35y35t | ERX4530492 | ERS5073698 (SAMEA7315155) | ERR4596830 |
| sk36y36t | ERX4530493 | ERS5073699 (SAMEA7315156) | ERR4596831 |
| sk37y37t | ERX4530494 | ERS5073700 (SAMEA7315157) | ERR4596832 |
| sk38y38t | ERX4530495 | ERS5073701 (SAMEA7315158) | ERR4596833 |
| sk39y39t | ERX4530496 | ERS5073702 (SAMEA7315159) | ERR4596834 |
| sk40y40t | ERX4530497 | ERS5073703 (SAMEA7315160) | ERR4596835 |
| sk42y42t | ERX4530498 | ERS5073704 (SAMEA7315161) | ERR4596836 |
| sk41y41t | ERX4530499 | ERS5073705 (SAMEA7315162) | ERR4596837 |
| sk43y43t | ERX4530500 | ERS5073706 (SAMEA7315163) | ERR4596838 |
| sk44y44t | ERX4530501 | ERS5073707 (SAMEA7315164) | ERR4596839 |
| sk45y45t | ERX4530502 | ERS5073708 (SAMEA7315165) | ERR4596840 |

|            |            |                           |            |
|------------|------------|---------------------------|------------|
| sk46y46t   | ERX4530503 | ERS5073709 (SAMEA7315166) | ERR4596841 |
| sk47y47t   | ERX4530504 | ERS5073710 (SAMEA7315167) | ERR4596842 |
| sk48y48t   | ERX4530505 | ERS5073711 (SAMEA7315169) | ERR4596843 |
| sk49y49t   | ERX4530506 | ERS5073712 (SAMEA7315170) | ERR4596844 |
| sk50y50t   | ERX4530507 | ERS5073713 (SAMEA7315171) | ERR4596845 |
| sk51y51t   | ERX4530508 | ERS5073714 (SAMEA7315172) | ERR4596846 |
| sk52y52t   | ERX4530509 | ERS5073715 (SAMEA7315173) | ERR4596847 |
| sk53y53t   | ERX4530510 | ERS5073716 (SAMEA7315174) | ERR4596848 |
| sk54y54t   | ERX4530511 | ERS5073717 (SAMEA7315175) | ERR4596849 |
| sk55y55t   | ERX4530512 | ERS5073718 (SAMEA7315176) | ERR4596850 |
| sk56y56t   | ERX4530513 | ERS5073719 (SAMEA7315177) | ERR4596851 |
| sk57y57t   | ERX4530514 | ERS5073720 (SAMEA7315178) | ERR4596852 |
| sk58y58t   | ERX4530515 | ERS5073721 (SAMEA7315179) | ERR4596853 |
| sk59y59t   | ERX4530516 | ERS5073722 (SAMEA7315180) | ERR4596854 |
| sk60y60t   | ERX4530517 | ERS5073723 (SAMEA7315181) | ERR4596855 |
| sk185y185t | ERX4530518 | ERS5073724 (SAMEA7315182) | ERR4596856 |
| sk136y136t | ERX4530519 | ERS5073725 (SAMEA7315183) | ERR4596857 |
| sk137y137t | ERX4530520 | ERS5073726 (SAMEA7315184) | ERR4596858 |
| sk138y138t | ERX4530521 | ERS5073727 (SAMEA7315185) | ERR4596859 |
| sk139y139t | ERX4530522 | ERS5073728 (SAMEA7315186) | ERR4596860 |
| sk140y140t | ERX4530523 | ERS5073729 (SAMEA7315187) | ERR4596861 |
| sk141y141t | ERX4530524 | ERS5073730 (SAMEA7315188) | ERR4596862 |
| sk142y142t | ERX4530525 | ERS5073731 (SAMEA7315189) | ERR4596863 |
| sk143y143t | ERX4530526 | ERS5073732 (SAMEA7315190) | ERR4596864 |
